# Supplementary material
Source: PubMed Central journal article supplement (PMC2613059)
Supplement: en.2008-0768_3.pdf [file en.2008-0768_3.pdf]

Table 1: Number of Mice Used in the Microarray

| <b>NUMBER OF MICE USED IN MICROARRAY EXPERIMENT</b> |     |   |   |    |   |   |    |   |   |    |   |   |    |   |   |    |   |   |    |   |   |    |   |   |
|-----------------------------------------------------|-----|---|---|----|---|---|----|---|---|----|---|---|----|---|---|----|---|---|----|---|---|----|---|---|
| EXPOSURE TIME (h)                                   | 4   |   |   |    |   |   | 16 |   |   |    |   |   | 28 |   |   |    |   |   | 76 |   |   |    |   |   |
| TREATMENT                                           | SO  |   |   | P  |   |   | SO |   |   | P  |   |   | SO |   |   | P  |   |   | SO |   |   | P  |   |   |
| MOUSE SET                                           | 1   | 2 | 3 | 1  | 2 | 3 | 1  | 2 | 3 | 1  | 2 | 3 | 1  | 2 | 3 | 1  | 2 | 3 | 1  | 2 | 3 | 1  | 2 | 3 |
| MICE/SET                                            | 5   | 5 | 5 | 5  | 5 | 5 | 5  | 5 | 5 | 5  | 5 | 5 | 5  | 5 | 5 | 5  | 5 | 5 | 5  | 5 | 5 | 5  | 5 | 5 |
| MICE/TREATMENT                                      | 15  |   |   | 15 |   |   | 15 |   |   | 15 |   |   | 15 |   |   | 15 |   |   | 15 |   |   | 15 |   |   |
| MICE/TIME POINT                                     | 30  |   |   |    |   |   | 30 |   |   |    |   |   | 30 |   |   |    |   |   | 30 |   |   |    |   |   |
| TOTAL MICE                                          | 120 |   |   |    |   |   |    |   |   |    |   |   |    |   |   |    |   |   |    |   |   |    |   |   |

SO : SESAME OIL

P : PROGESTERONE

(h) : HOURS

# SUPPLEMENTAL TABLE 1
