# Supplementary material
Source: PubMed Central journal article supplement (PMC2613059)
Supplement: en.2008-0768_4.pdf [file en.2008-0768_4.pdf]

**Table 3: List of 56 Genes Induced By Both Progesterone and Prolactin**

| <i>Symbol</i> | <i>Entrez ID</i> | <i>Title</i>                                                                   |
|---------------|------------------|--------------------------------------------------------------------------------|
| 1110036O03Rik | 66180            | RIKEN cDNA 1110036O03 gene                                                     |
| 1600029D21Rik | 76509            | RIKEN cDNA 1600029D21 gene                                                     |
| Areg          | 11839            | amphiregulin                                                                   |
| Aurka         | 20878            | aurora kinase A                                                                |
| BC037006      | 211652           | cDNA sequence BC037006                                                         |
| Bdnf          | 12064            | brain derived neurotrophic factor                                              |
| Calca         | 12310            | calcitonin/calcitonin-related polypeptide, alpha                               |
| Cdh11         | 12552            | cadherin 11                                                                    |
| Ceacam1       | 26365            | CEA-related cell adhesion molecule 1                                           |
| Cel           | 12613            | carboxyl ester lipase                                                          |
| Cks2          | 66197            | CDC28 protein kinase regulatory subunit 2                                      |
| Cldn3         | 12739            | claudin 3                                                                      |
| Cldn7         | 53624            | claudin 7                                                                      |
| Col7a1        | 12836            | procollagen, type VII, alpha 1                                                 |
| Dsg2          | 13511            | desmoglein 2                                                                   |
| Dusp16        | 70686            | dual specificity phosphatase 16                                                |
| Egr2          | 13654            | early growth response 2                                                        |
| Elf5          | 13711            | E74-like factor 5                                                              |
| ErbB3         | 13867            | v-erb-b2 erythroblastic leukemia viral oncogene homolog 3 (avian)              |
| Expi          | 14038            | extracellular proteinase inhibitor                                             |
| Fcgbp         | 215384           | Fc fragment of IgG binding protein                                             |
| Foxa1         | 15375            | forkhead box A1                                                                |
| Fxyd3         | 17178            | FXYD domain-containing ion transport regulator 3                               |
| Gata3         | 14462            | GATA binding protein 3                                                         |
| Hc            | 15139            | hemolytic complement                                                           |
| Hnrpa1        | 15382            | heterogeneous nuclear ribonucleoprotein A1                                     |
| Itih2         | 16425            | inter-alpha trypsin inhibitor, heavy chain 2                                   |
| Krt1-18       | 16668            | keratin complex 1, acidic, gene 18                                             |
| Krt1-19       | 16669            | keratin complex 1, acidic, gene 19                                             |
| Krt2-7        | 110310           | keratin complex 2, basic, gene 7                                               |
| Krt2-8        | 16691            | keratin complex 2, basic, gene 8                                               |
| Lama1         | 16772            | laminin, alpha 1                                                               |
| Lamb3         | 16780            | laminin, beta 3                                                                |
| Lisch7        | 54135            | liver-specific bHLH-Zip transcription factor                                   |
| Mmp15         | 17388            | matrix metalloproteinase 15                                                    |
| Mtap7         | 17761            | microtubule-associated protein 7                                               |
| Nfe2l3        | 18025            | nuclear factor, erythroid derived 2, like 3                                    |
| Ocln          | 18260            | occludin                                                                       |
| Perp          | 64058            | PERP, TP53 apoptosis effector                                                  |
| Phldb2        | 208177           | pleckstrin homology-like domain, family B, member 2                            |
| Ptprf         | 19268            | protein tyrosine phosphatase, receptor type, F                                 |
| Rspo1         | 192199           | R-spondin homolog ( <i>Xenopus laevis</i> )                                    |
| Sdc1          | 20969            | syndecan 1                                                                     |
| Shrm          | 27428            | shroom                                                                         |
| Slc7a5        | 20539            | solute carrier family 7 (cationic amino acid transporter, y+ system), member 5 |
| Spint1        | 20732            | serine protease inhibitor, Kunitz type 1                                       |
| Tacstd1       | 17075            | tumor-associated calcium signal transducer 1                                   |

| <i>Symbol</i> | <i>Entrez ID</i> | <i>Title</i>                                              |
|---------------|------------------|-----------------------------------------------------------|
| Tcfap2b       | 21419            | transcription factor AP-2 beta                            |
| Tcfap2c       | 21420            | transcription factor AP-2, gamma                          |
| Tk1           | 21877            | thymidine kinase 1                                        |
| Tnfsf11       | 21943            | tumor necrosis factor (ligand) superfamily, member 11     |
| Tpd52l1       | 21987            | tumor protein D52-like 1                                  |
| Trp63         | 22061            | transformation related protein 63                         |
| Uhrf1         | 18140            | ubiquitin-like, containing PHD and RING finger domains, 1 |
| Wnt4          | 22417            | wingless-related MMTV integration site 4                  |
| Wnt5b         | 22419            | wingless-related MMTV integration site 5B                 |

## SUPPLEMENTAL TABLE 3
