# Supplementary material
Source: PubMed Central journal article supplement (PMC2613059)

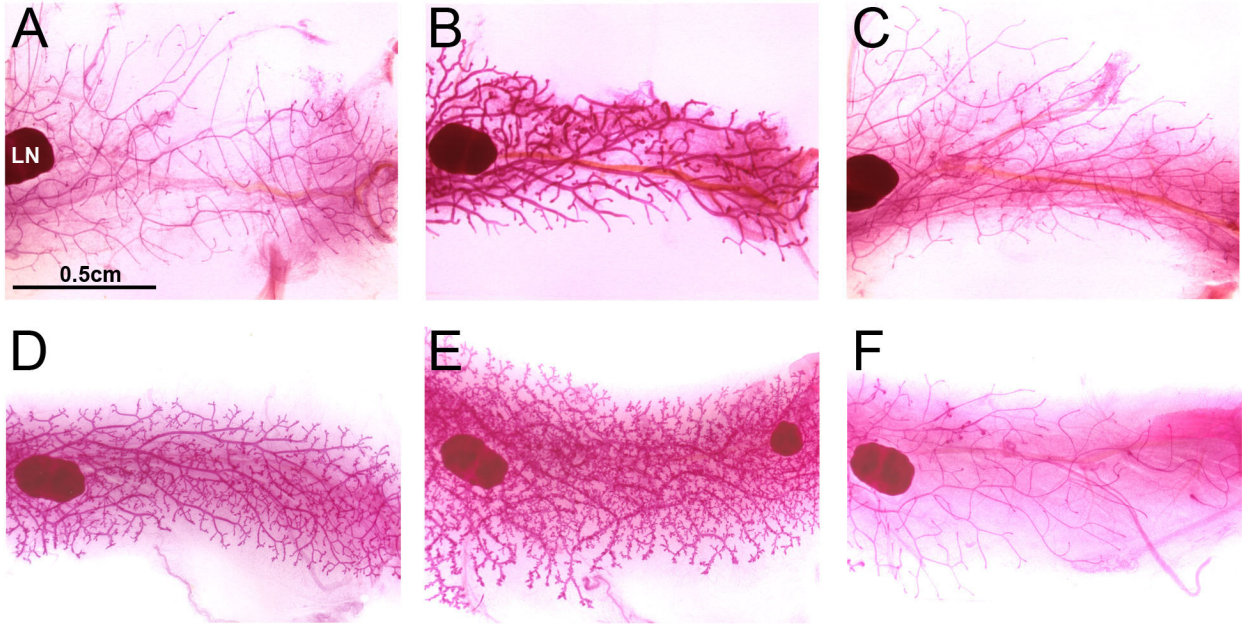

**SUPPLEMENTAL  
FIGURE 1**

Supplement: en.2008-0768_1.pdf [file en.2008-0768_1.pdf]

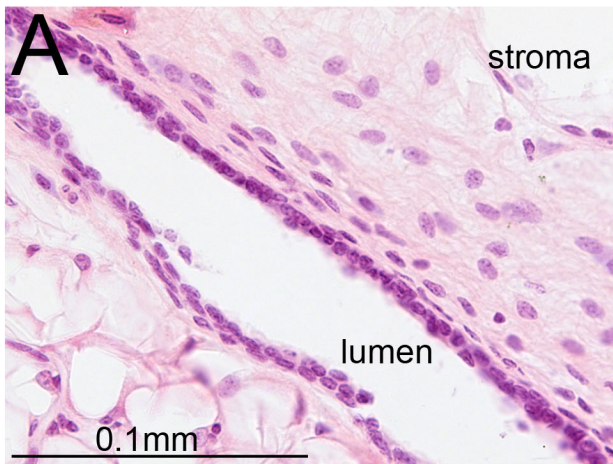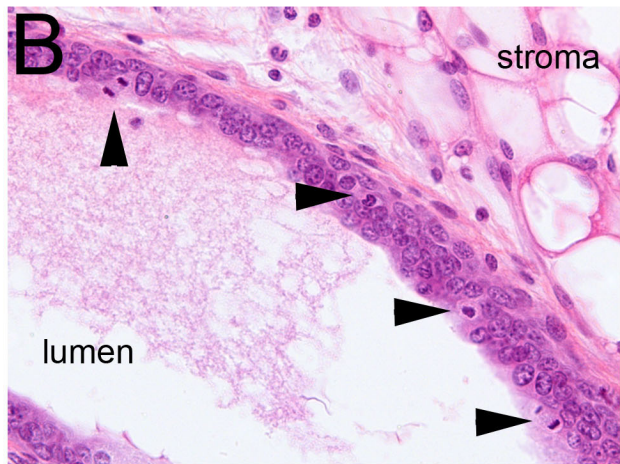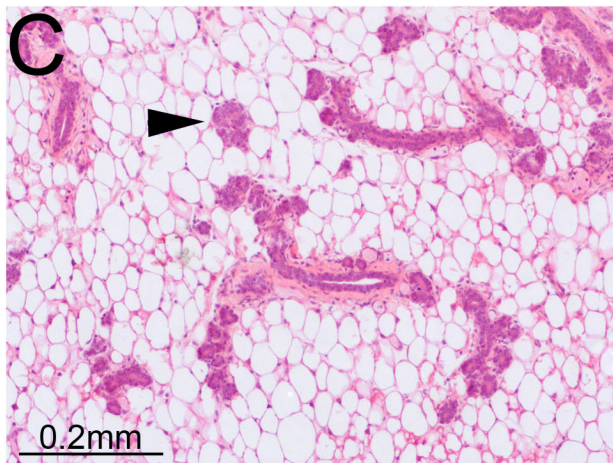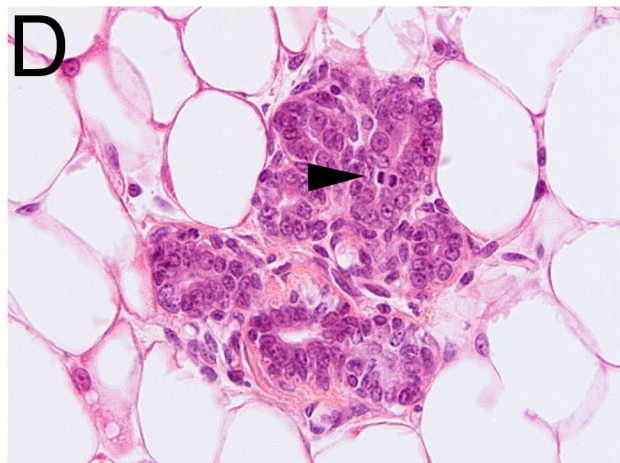

**SUPPLEMENTAL  
FIGURE 2**

Supplement: en.2008-0768_2.pdf [file en.2008-0768_2.pdf]
